# Supplementary material for: Intraflagellar transport 46 (IFT46) is essential for trafficking IFT proteins between cilia and cytoplasm in Paramecium
Source: PubMed Central journal article supplement (PMC6006156; doi:10.1038/s41598-018-27050-8), 2018-06-18
Supplement: 41598_2018_27050_MOESM1_ESM.pdf [file 41598_2018_27050_MOESM1_ESM.pdf]

# Supplementary work

**Intraflagellar transport 46 (IFT46) is essential for trafficking IFT proteins between cilia and cytoplasm in *Paramecium***

**Lei SHI<sup>1\*</sup> Xuezhen SHI<sup>2</sup> & Yuan SHEN<sup>3\*</sup>**

<sup>1</sup>School of Basic Medical Sciences, Xinxiang Medical University, Xinxiang, 453003, P.R. China.

<sup>2</sup>School of Life Science, Henan Normal University, Xinxiang, 453003, P.R. China.

<sup>3</sup>School of Pharmacy, Xinxiang Medical University, Xinxiang, 453002, P.R. China

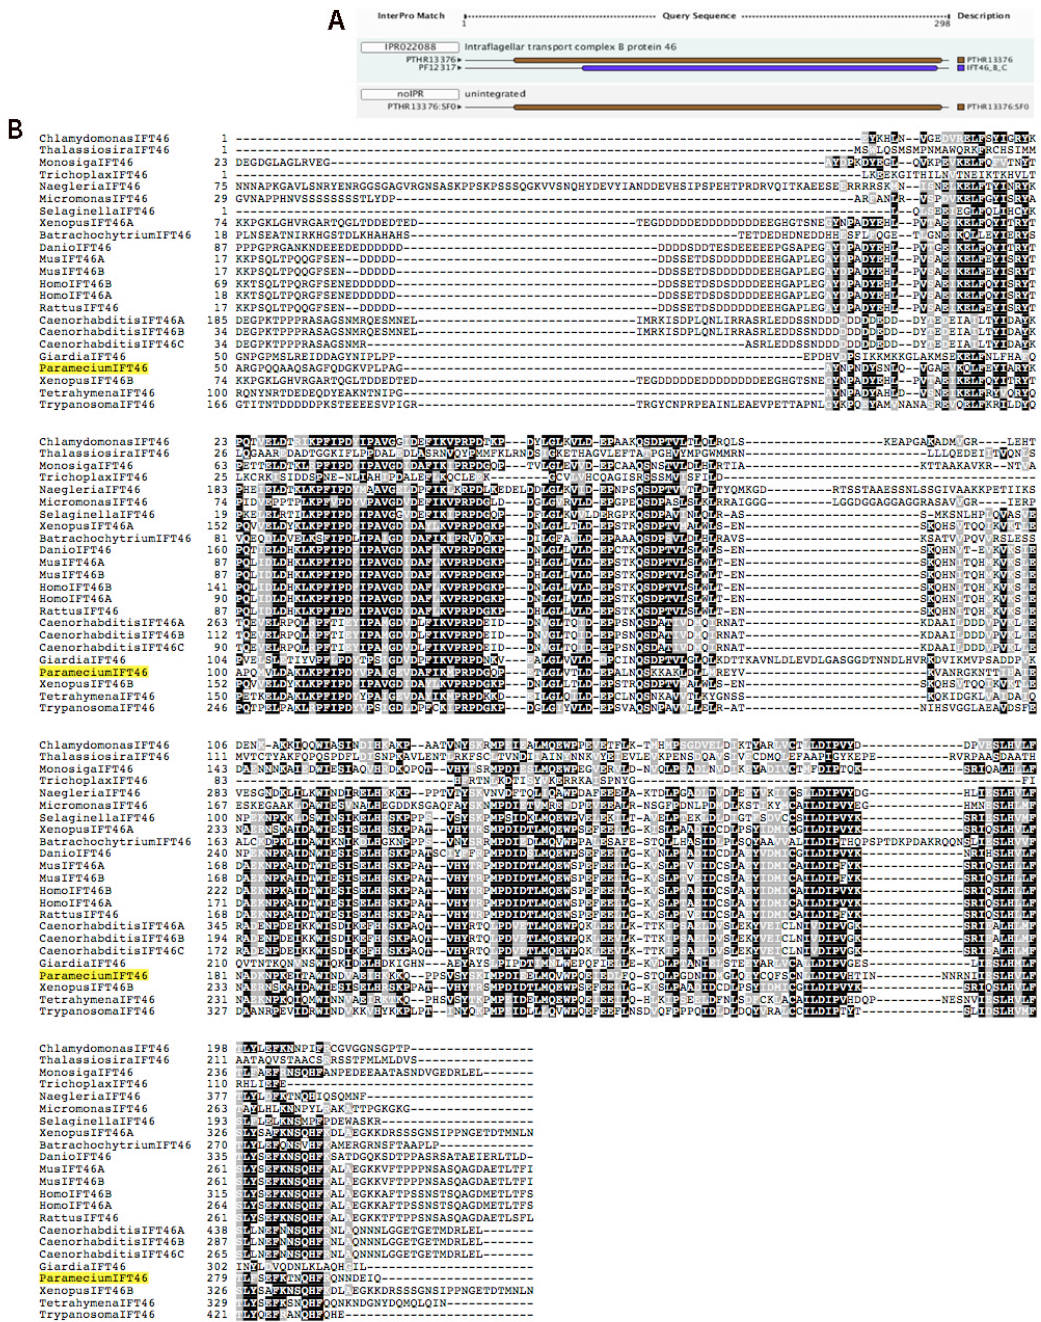

**Figure S1. A:** InterPro scanning revealed that IFT46 contained a conserved C-terminal domain (IFT46\_B\_C) **B:** The alignment of IFT46 proteins of various species shows that they are highly conserved through evolution, including in *Paramecium*.

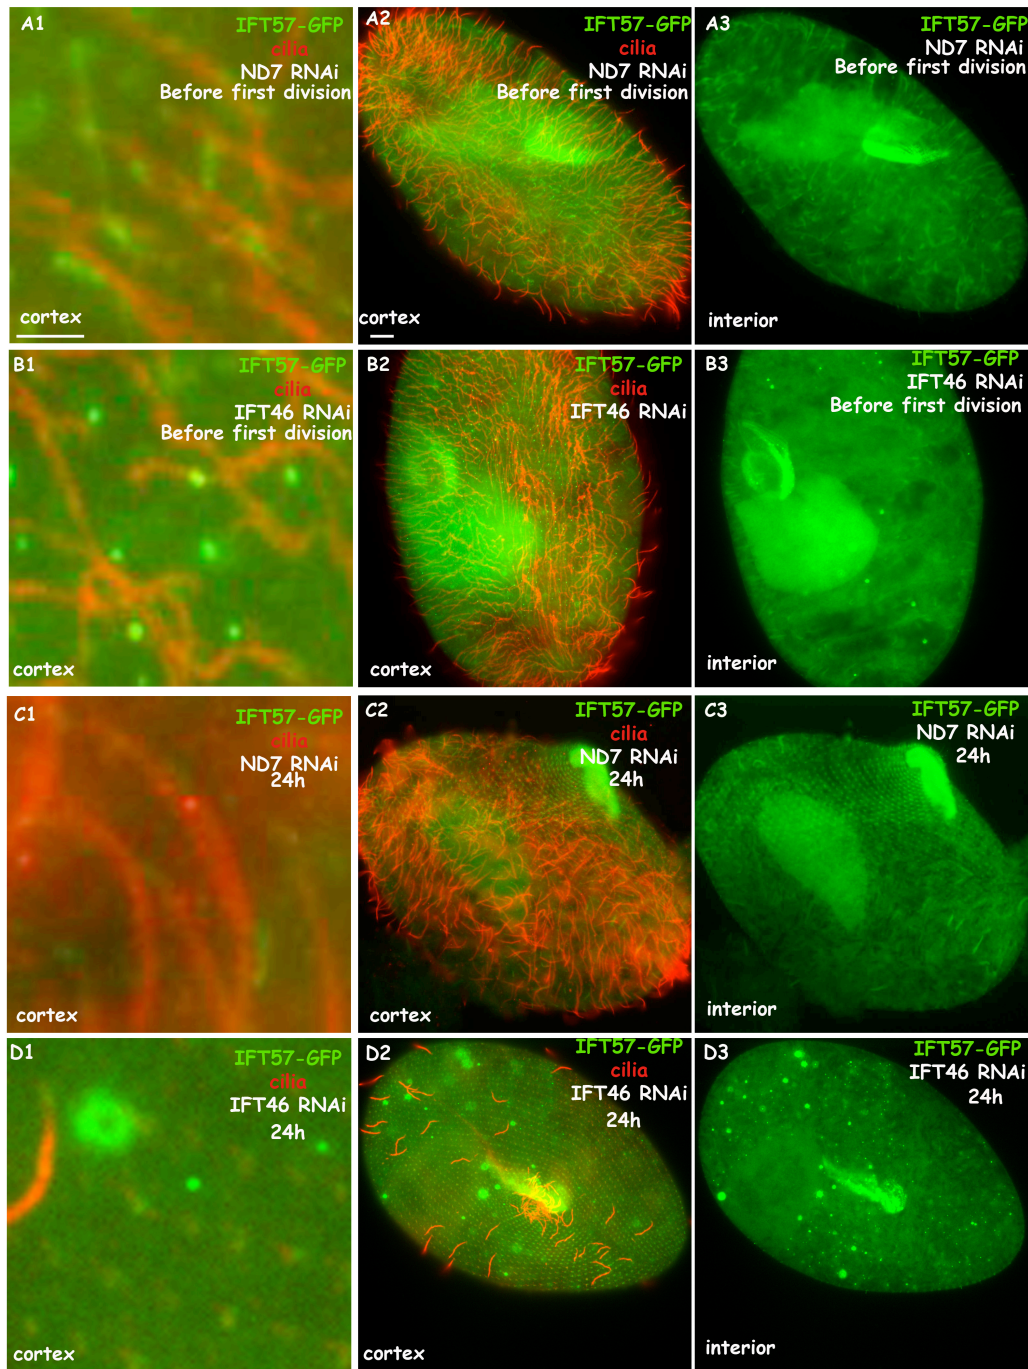

**Figure S2. IFT57-GFP fusion protein accumulated at the cortex and cytoplasm when cells lost most cilia after treated with IFT46 RNAi.**

A1–A3: IFT57-GFP fusion protein localised at some cilia in cells treated with ND7 RNAi as control before the first division; B1–B3: IFT57-GFP fusion protein accumulated abnormally between basal bodies and in the cytoplasm of IFT46 RNAi-treated cells before the first division; C1–C3: IFT57-GFP fusion protein localised at some cilia in cells treated with ND7 RNAi as control for 24 h; D1–D3: Accumulation of IFT57-GFP focused on the cytoplasm of IFT46 RNAi cells for 24 h, when cell lost most cilia. Bar: 10  $\mu$ m.

### Legend to Supplementary TableS1, TableS2 and TableS3

**Table S1. GO analysis lists the richest categories of common genes whose expression are both modified by depletion of IFT46 and depletion of IFT80.**

**Table S2. GO analysis lists the richest categories of genes whose expression are specifically modified under depletion of IFT46.**

**Table S3. GO analysis lists the most richest categories of genes whose expression are specifically modified under depletion of IFT80**

| Primer ID | Primer sequence                                    | Use                    |
|-----------|----------------------------------------------------|------------------------|
| P1        | 5'-atacttggatccTATTTAATATAATTAATAAATACTGTTATTC -3' | IFT46 (gene)           |
| P2        | 5'- GACAAAACAATGATGAAATTTAAggcatgcaagtat -3'       | IFT46 (gene)           |
| P3        | 5'- atacttggctacctgaATATTCAATAATATAACATTATTTTC -3' | IFT46 (3'-UTR)         |
| P4        | 5'- GGAATATTTATTATAATTATTA -3'                     | IFT46 (3'-UTR)         |
| P5        | 5'- ttattactagtGCTGGAGCTAGAGGACCCCAATAAGC -3'      | RNAi IFT46             |
| P6        | 5'- GGTGTGGCCACAAGAGATTGAAGctcgagaacc -3'          | RNAi IFT46             |
| P7        | 5'- ttattCTCGAGCAAATTATTGATTTAATAGATG-3'           | RNAi IFT80             |
| P8        | 5'- ggttGGTACCGACCAGCAAGTGCAGCCCACAATG-3'          | RNAi IFT80             |
| P9        | 5'- AAGTCGGTAATGCCTGTTGG-3'                        | qPCR $\alpha$ -tubulin |
| P10       | 5'- ATTCAAGGCACCATCGAATC-3'                        | qPCR $\alpha$ -tubulin |
| P11       | 5'- CACACAATTACCAGGGGACA-3'                        | qPCR IFT46             |
| P12       | 5'- CAGGAATGTCTAATAAATTGCATGA -3'                  | qPCR IFT46             |
| P13       | 5'- TGGAGTCCAGACAATGATGG -3'                       | qPCR IFT80             |
| P14       | 5'- TCCACCTTCAAACCAAACC -3'                        | qPCR IFT80             |

**Table S4. Primers used for the cloning and RT-qPCR of this study.**
